# Supplementary material for: Differential Effects of Transcranial Magnetic Stimulation Targeting Both Hemispheres on Unilateral Spatial Neglect During Stroke Recovery: Insights from the Interhemispheric Inhibition Theory
Source: Research Square preprint supplement (doi:10.21203/rs.3.rs-7036048/v1), 2025-07-29
Supplement: Supplementary file 1 [file 3350d5b63bb229b2d8c3604a.xlsx]

## Sheet: 原始数据
序号	group	gender	age	education	duration_days	stroke_type	CBS（前）	CBS（后）	直线二等分（前）	直线二等分（后）	线段划消（前）	线段划消（后）	星星删除（前）	星星删除（后）	字母删除（前）	字母删除（后）	临摹测试（前）	临摹测试（后）	代表性绘图（前）	代表性绘图（后）	BIT总分（前）	BIT总分（后）	Fugl—Meyer（前）	Fugl—Meyer（后）	MBI（前）	MBI（后）	CBS差值
1	1	1	57	2	22	1	18	9	3	5	18	27	25	42	19	26	1	1	0	2	66	103	52	72	55	70	9
2	1	1	43	3	14	1	15	6	5	5	22	30	27	40	25	30	1	2	1	2	80	109	62	78	60	70	9
3	1	2	65	2	17	1	22	12	2	4	17	20	23	30	21	24	1	1	0	0	63	79	47	63	50	60	10
4	1	1	50	3	23	1	17	7	2	3	19	23	28	39	21	25	0	1	0	0	70	91	54	78	55	65	10
5	1	1	73	1	21	2	25	17	1	2	10	15	16	19	11	16	1	0	0	0	38	52	28	46	25	45	8
6	1	2	66	1	15	1	23	17	2	4	9	14	16	17	10	18	0	1	0	0	37	54	25	44	30	45	6
7	1	1	59	2	17	2	18	11	3	5	21	25	30	33	24	26	2	2	1	2	81	93	66	71	55	65	7
8	1	1	71	1	19	2	21	15	2	3	17	20	23	24	18	17	1	2	1	1	62	67	33	52	40	50	6
9	1	1	73	2	23	1	26	22	1	2	11	13	16	18	9	10	0	0	0	0	37	43	49	75	25	45	4
10	1	2	55	3	21	2	19	10	2	4	19	20	26	30	17	22	1	2	0	2	65	80	62	86	50	60	9
11	1	1	62	2	22	1	16	10	5	6	23	29	31	37	20	32	3	2	2	1	82	107	50	75	60	75	6
12	1	2	67	1	14	1	22	17	4	4	22	28	32	33	18	29	1	2	1	1	78	97	62	80	50	70	5
13	1	1	69	1	15	1	20	15	2	3	16	26	26	34	19	30	0	1	1	0	63	94	44	61	45	65	5
14	1	1	72	1	22	2	21	17	3	3	18	23	28	31	17	23	1	2	0	1	67	83	52	76	50	55	4
15	1	2	71	2	27	1	22	14	2	2	17	14	17	22	10	12	0	1	0	9	46	60	33	45	35	45	8
16	1	2	70	2	21	2	16	9	5	7	25	30	31	39	28	33	2	2	2	2	92	113	70	91	60	80	7
17	1	1	69	2	16	2	20	14	2	4	17	26	22	28	15	23	1	2	1	1	58	84	52	77	45	60	6
18	1	2	71	2	14	1	22	18	2	4	8	13	16	20	3	7	0	1	0	0	29	45	25	44	30	35	4
19	1	2	57	3	15	2	12	5	8	9	30	36	44	51	28	37	2	3	2	2	113	138	75	92	65	85	7
20	1	1	59	3	19	1	18	12	3	7	19	28	31	40	18	28	1	2	1	1	72	106	63	85	65	80	6
21	1	1	66	2	16	1	23	14	1	2	16	13	26	27	13	15	1	1	0	1	57	59	54	67	45	55	9
22	1	2	68	2	17	1	19	11	2	4	14	23	23	28	12	20	1	1	0	1	51	77	49	70	45	60	8
23	1	1	70	1	14	1	17	10	3	6	17	26	26	31	15	33	3	2	2	1	64	99	52	77	55	65	7
24	1	2	71	1	18	2	23	18	1	4	11	24	19	34	9	27	0	1	0	1	40	91	38	66	35	60	5
25	1	2	58	2	24	2	11	3	7	9	27	36	42	53	29	38	2	3	2	2	108	141	75	89	70	90	8
26	1	1	65	2	22	1	18	5	3	7	17	33	31	47	19	36	1	3	1	2	72	128	67	85	60	80	13
27	1	2	67	2	21	2	15	3	6	9	29	36	33	50	27	37	2	3	2	2	99	137	76	90	65	75	12
28	2	1	70	1	18	2	20	14	4	7	21	30	30	44	20	33	1	2	1	2	77	118	63	85	60	80	6
29	2	1	69	2	15	1	25	14	1	3	7	25	11	31	6	24	0	2	0	1	25	86	28	49	30	60	11
30	2	2	71	2	26	1	21	13	0	3	9	19	19	33	8	22	0	2	0	0	36	79	33	47	35	55	8
31	2	1	74	1	23	2	17	8	4	7	20	30	30	43	5	23	2	3	0	2	63	108	54	78	45	75	9
32	2	2	67	2	27	1	16	7	5	9	21	32	45	50	24	35	1	3	1	2	99	131	71	88	65	80	9
33	2	1	45	3	15	1	15	2	5	9	22	36	38	54	21	39	2	3	2	3	90	144	68	82	70	80	13
34	2	1	57	3	14	1	17	3	3	7	17	31	28	49	15	36	1	2	1	2	65	127	54	75	55	75	14
35	2	2	62	3	19	2	16	4	5	8	19	36	29	52	21	40	1	3	1	2	76	141	63	87	60	85	12
36	2	1	66	2	21	1	19	8	4	8	22	30	31	50	20	31	1	3	1	2	80	124	73	85	65	85	11
37	2	1	69	2	26	1	22	10	1	3	12	16	25	39	14	22	0	1	0	1	52	82	45	70	40	60	12
38	2	1	71	1	22	2	24	15	1	1	7	9	20	21	7	19	0	0	0	0	35	50	27	48	35	45	9
39	2	2	72	2	25	1	17	6	3	8	19	30	32	48	24	40	1	2	1	2	81	130	70	85	55	75	11
40	2	1	48	3	18	2	16	3	5	9	23	33	34	46	29	39	2	3	2	2	96	132	78	92	60	80	13
41	2	1	55	2	16	1	17	4	6	9	25	36	37	51	25	40	1	3	1	2	96	141	72	90	65	85	13
42	2	2	69	2	17	1	20	12	1	4	16	28	27	44	14	25	2	3	0	1	61	105	54	76	45	65	8
43	2	2	73	1	23	2	21	11	2	4	17	22	30	41	18	23	1	2	0	2	71	94	52	80	50	65	10
44	2	1	52	2	21	1	16	7	3	8	19	34	34	49	23	40	2	3	2	3	83	137	69	78	60	75	9
45	2	1	64	2	22	2	19	11	2	6	18	27	31	47	14	21	1	2	0	2	69	105	57	74	55	65	8
46	2	2	62	3	16	1	15	6	6	9	25	36	38	54	25	40	2	3	3	3	100	145	77	90	65	80	9
47	2	1	71	1	15	1	23	16	1	5	11	22	27	37	9	25	1	2	0	2	50	93	43	78	55	65	7
48	2	2	43	3	14	1	17	2	4	7	19	31	21	35	22	38	1	2	2	2	70	115	55	81	40	60	15
49	2	1	56	2	23	2	18	5	5	8	26	30	35	42	24	33	1	2	1	2	94	117	78	87	60	75	13
50	2	1	57	1	17	1	15	4	7	9	24	33	31	50	21	37	1	2	1	2	86	133	74	89	55	75	11
51	2	2	68	2	16	2	25	16	1	3	9	16	14	20	6	14	0	2	0	0	30	55	35	47	40	50	9
52	2	1	61	2	20	1	15	7	7	9	23	36	34	52	28	38	3	3	1	3	96	141	76	92	60	80	8
53	2	1	72	2	19	1	17	10	3	7	21	29	27	45	19	30	2	2	1	2	73	115	54	77	40	65	7
